# Supplementary material
Source: PubMed Central journal article supplement (PMC5661650)
Supplement: sigtrans201630-s1.pdf [file sigtrans201630-s1.pdf]

### Suppl. Table 1

| <b>Gene</b>          | <b>Fold change<br/>(PD-L1<sup>lo</sup>/ctrl)</b> | <b>P value</b>  |
|----------------------|--------------------------------------------------|-----------------|
| <b><i>cd24</i></b>   | <b>0.0670</b>                                    | <b>1.39E-11</b> |
| <b><i>c-kit</i></b>  | <b>0.0158</b>                                    | <b>3.03E-39</b> |
| <b><i>lin28a</i></b> | <b>0.1235</b>                                    | <b>4.62E-18</b> |
| <b><i>nes</i></b>    | <b>0.3096</b>                                    | <b>3.47E-15</b> |
| <b><i>ck18</i></b>   | <b>0.6185</b>                                    | <b>1.10E-03</b> |

RNA-Seq data from the ID8agg and ID8agg PD-L1<sup>lo</sup> clone 3 total cells for ovarian cancer associated stemness genes. Fold changes were calculated as the ratio of expression in PD-L1<sup>lo</sup> cells compared to control cells.
